# Supplementary material for: Sulfur-source-dependent phase-selective preparation of Cu3NiInSnS6nanocrystals and their optical and magnetic properties
Source: Royal Society of Chemistry journal article supplement (doi:10.1039/d2dt01643e), 2022-01-01
Supplement: d2dt01643e1.pdf [file d2dt01643e1.pdf]

## **Electronic Supplementary Information**

### **Sulfur-source-dependent phase-selective preparation of $\text{Cu}_3\text{NiInSnS}_6$ nanocrystals and their optical and magnetic properties**

Qinghuan Bian, Huanxi Liao, Changcun Tang, Kunjiao Li, Jiabao Wan, Yanhe Xiao,

Baochang Cheng and Shuijin Lei\*

*School of Physics and Materials Science, Nanchang University, Nanchang, Jiangxi*

*330031, P R. China*

\* To whom correspondence should be addressed. E-mail: [shjlei@ncu.edu.cn](mailto:shjlei@ncu.edu.cn)

**Table S1** The calculated grain sizes of the wurtzite and zinc blende  $\text{Cu}_3\text{NiInSnS}_6$  samples prepared under different conditions according to the Scherrer formula.

| sample        | wurtzite $\text{Cu}_3\text{NiInSnS}_6$ |        |        |        | zinc blende $\text{Cu}_3\text{NiInSnS}_6$ |        |        |
|---------------|----------------------------------------|--------|--------|--------|-------------------------------------------|--------|--------|
| sulfur source | DDT                                    |        |        |        | S                                         |        |        |
| ligand        | DDT                                    | OLA    | OA     | OA+OLA | OLA                                       | OA     | OA+OLA |
| grain size    | 5.7 nm                                 | 5.3 nm | 5.1 nm | 4.9 nm | 10.0 nm                                   | 9.7 nm | 9.8 nm |

**Table S2** The atomic percent and atomic ratio of the prepared wurtzite and zinc blende structure  $\text{Cu}_3\text{NiInSnS}_6$  nanocrystals according to the XPS results.

| element      | wurtzite $\text{Cu}_3\text{NiInSnS}_6$ | zinc blende $\text{Cu}_3\text{NiInSnS}_6$ |
|--------------|----------------------------------------|-------------------------------------------|
| Cu           | 25.06%                                 | 24.87%                                    |
| Ni           | 7.78%                                  | 8.08%                                     |
| In           | 7.69%                                  | 8.04%                                     |
| Sn           | 7.63%                                  | 7.95%                                     |
| S            | 51.84%                                 | 51.06%                                    |
| atomic ratio | 3:0.93:0.92:0.91:6.2                   | 3:0.97:0.96:0.95:6.11                     |

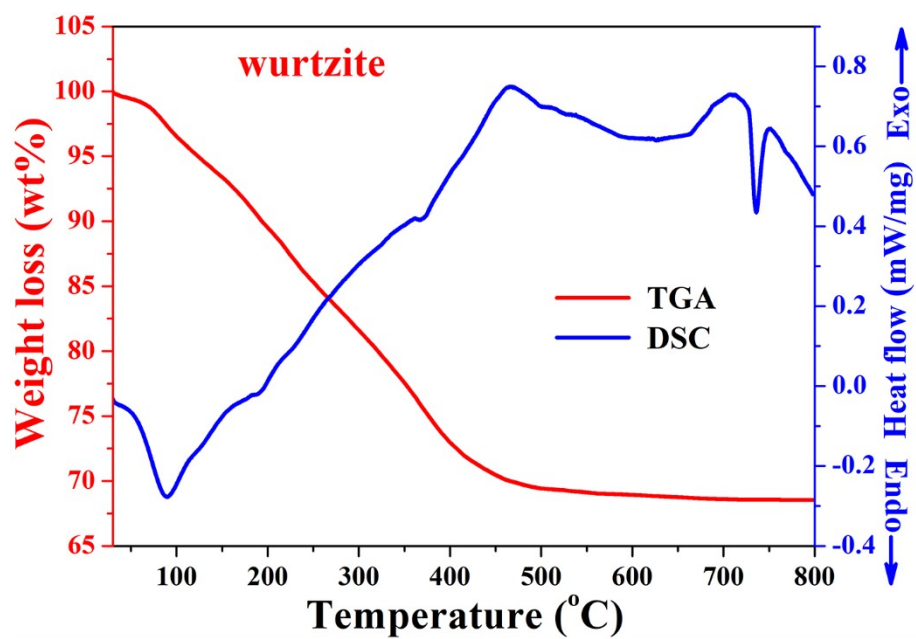

**Fig. S1** TGA and DSC curves of the as-prepared wurtzite  $\text{Cu}_3\text{NiInSnS}_6$  sample using DDT as the sulfur source and the mixture of OA and OLA as the ligands.

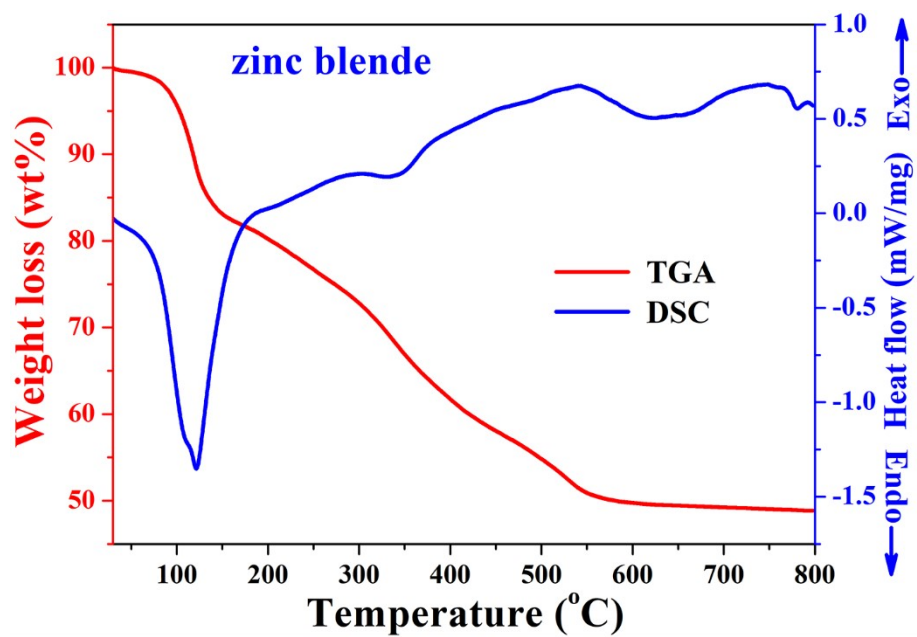

**Fig. S2** TGA and DSC curves of the as-prepared zinc blende  $\text{Cu}_3\text{NiInSnS}_6$  sample using elemental S as the sulfur source and the mixture of OA and OLA as the ligands.

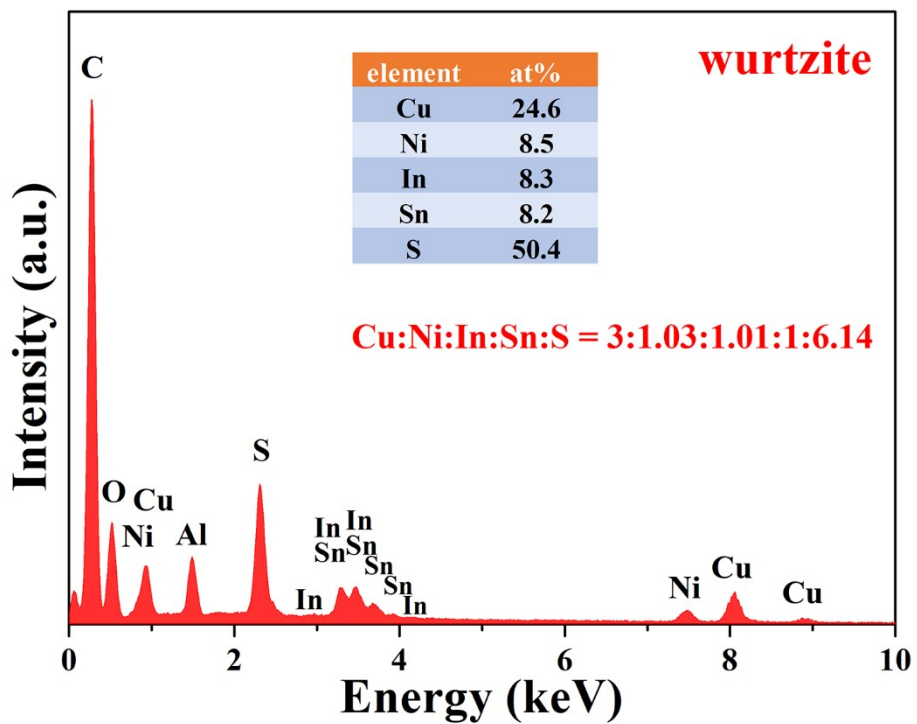

**Fig. S3** EDS spectrum of the as-prepared wurtzite  $\text{Cu}_3\text{NiInSnS}_6$  sample using DDT as the sulfur source and the mixture of OA and OLA as the ligands.

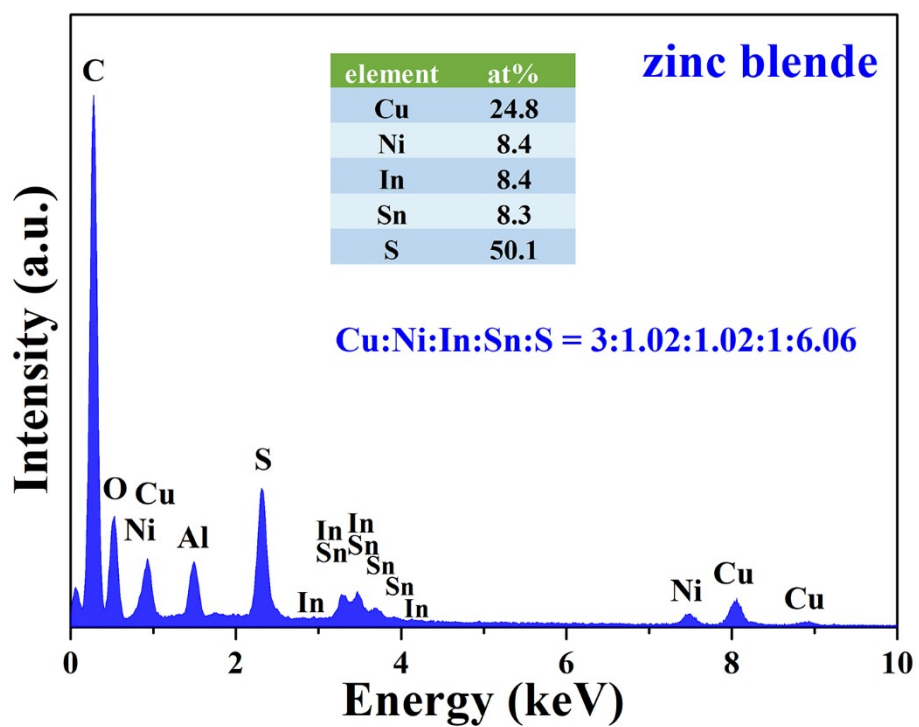

**Fig. S4** EDS spectrum of the as-prepared zinc blende  $\text{Cu}_3\text{NiInSnS}_6$  sample using elemental S as the sulfur source and the mixture of OA and OLA as the ligands.
